# Supplementary material for: Optimising Absorption in Luminescent Solar Concentrators constraint by Average Visible Transmission and Color Rendering Index
Source: Frontiers journal article supplement (doi:10.3389/fphy.2022.856799), 2022-07-22
Supplement: Table_1.XLSX [file Table_1.XLSX]

## Sheet: Legend
Column name	Description
#	Row number
Intended AVT	Set AVT constraint for the optimisation algorithm
Intended CRI	Set CRI constraint for the optimisation algorithm ("No cons" indicates no constraint has been set)
Lambda_c	Middle of absorption gap (Figure 2)
Sigma	One side width of absorption gap, 2 sigma is the width of the absorption gap (Figure 2)
A_lambda_c	Absorption coefficient in the absorption gap (Figure 2)
Optimisation success?	Is TRUE if the algorithm converted to an optimal solution, FALSE otherwise
Optimisation CRI	CRI found by the optimisation algorithm
Optimisation CIELab a*	CIELab a* found by the optimisation algorithm
Optimisation CIELab b*	CIELab b* found by the optimisation algorithm
Optimisation D_uv	D_uv found by the optimisation algorithm
Optimisation AVT	AVT found by the optimisation algorithm
Optimisation photon absorption	Amount of absorbed photons found by the optimisation algorithm
Ray trace photon absorption	Amount of absorbed photons found by the ray trace algorithm
Incident/side absorbed photons	Ratio between the incident photons and the photons absorbed by the sides
Shorit circuit current density (J_sc) A/m^2	Shorit circuit current density (J_sc) A/m^2 (Equation 2)
Open circuit voltage (V_oc)	Open circuit voltage (V)
Voltage max power point (V_mpp) (V)	Voltage at the max power point (V_mpp) V (Equation 3)
Current max power point (J_mpp) A/m^2	Current density max power point (J_mpp) A/m^2 (Equation 3)
PCE	Power conversion efficiency (Equation 1)
Ray trace CRI	CRI as found by the ray trace algorithm
Ray trace AVT	AVT found by the optimisation algorithm
Ray trace CIELab a*	CIELab a* found by the ray trace algorithm
Ray trace CIELab b*	CIELab b* found by the ray trace algorithm
Ray trace CIELab L	CIELab L found by the ray trace algorithm
Ray trace u'	CIE 1976 u' found by the ray trace algorithm
Ray trace v'	CIE 1976 v' found by the ray trace algorithm
Ray trace D_uv	D_uv found by the ray trace algorithm algorithm
Ray trace luminous flux (lumen)	Luminous flux (lumen) as found by the ray trace algorithm
Lux (lumen/m^2)	Lux (lumen/m^2) as found by the ray trace algorithm

## Sheet: Results
#	Intended AVT	Intended CRI	Lambda_c	Sigma	A_lambda_c	Optimisation success?	Optimisation CRI	Optimisation CIELab a*	Optimisation CIELab b*	Optimisation D_uv	Optimisation AVT	Optimisation photon absorption (10^20)	Ray trace photon absorption (10^20)	side absorbed photons/incident	Short circuit current (J_sc) A/m^2	Open circuit voltage (V_oc) (V)	Voltage max power point (V_mpp) (V)	Current max power point (J_mpp) A/m^2	PCE	Ray trace CRI	Ray trace AVT	Ray trace CIELab a*	Ray trace CIELab b*	Ray trace CIELab L	Ray trace u'	Ray trace v'	Ray trace D_uv	Ray trace luminous flux (lumen)	Ray trace Lux (lumen/m^2)
0	55	70	537.797	93.8213	92.8148	TRUE	70.1104	-18.1776	15.1801	0.0238978	55	20.1105	20	0.343878	198.479	0.763164	0.678794	-190.887	0.129521	70.1343	0.558285	-18.0844	15.7812	79.7923	0.189095	0.334151	0.0237958	5550.53	61672.6
1	55	75	535.484	96.404	93.2342	TRUE	75.0088	-15.897	10.352	0.0204829	55	20.025	19.9	0.342129	197.474	0.763033	0.678662	-189.92	0.12884	75.0243	0.559412	-16.2296	11.0935	79.8513	0.189497	0.33016	0.0208703	5560.76	61786.3
2	55	80	535.125	99.8296	94.8304	TRUE	80.0412	-12.8442	7.38739	0.0165499	55	19.9128	19.7	0.339739	196.11	0.762853	0.678483	-188.608	0.127916	79.5639	0.560858	-13.2792	8.25727	79.8941	0.192181	0.327466	0.0170794	5568.19	61868.8
3	55	85	534.965	104.298	96.6823	TRUE	85.0663	-9.65767	4.93473	0.012541	55	19.7734	19.6	0.337569	194.842	0.762686	0.678316	-187.389	0.127058	84.9683	0.560748	-9.74361	5.59278	79.8393	0.195714	0.324811	0.0126676	5558.53	61761.5
4	55	90	535.707	109.853	98.7551	TRUE	90.1996	-6.34885	2.8481	0.00843709	55	19.5762	19.4	0.334655	193.153	0.762461	0.67809	-185.764	0.125915	90.3788	0.556867	-6.15171	3.04585	79.5663	0.199358	0.322218	0.00821148	5510.89	61232.1
5	55	95	537.634	118.325	100.865	TRUE	95.074	-3.20264	1.19603	0.00457247	55	19.258	19.1	0.328889	189.834	0.762013	0.677642	-182.572	0.123669	95.052	0.559239	-3.38789	1.17984	79.65	0.202232	0.320266	0.00476018	5525.21	61391.2
6	55	98	539.644	124.302	101.853	TRUE	97.1003	-1.8978	0.708184	0.00299695	54.9914	19.0079	18.9	0.32474	187.435	0.761684	0.677314	-180.265	0.122047	97.0394	0.556843	-1.85961	0.629751	79.4814	0.204081	0.319605	0.00293132	5495.91	61065.6
7	60	70	535.389	93.3152	74.0099	TRUE	70.0215	-19.5377	13.2207	0.0243575	60	19.696	19.5	0.335715	193.783	0.762545	0.678175	-186.371	0.126342	70.0545	0.611943	-19.6653	13.9171	82.7967	0.18673	0.332449	0.0244606	6089.47	67660.8
8	60	75	534.727	96.5183	75.5626	TRUE	75.2978	-16.3281	9.7375	0.0202916	60	19.5848	19.4	0.333991	192.775	0.76241	0.67804	-185.402	0.125659	75.2141	0.608147	-16.3466	10.414	82.555	0.189494	0.329329	0.0203351	6044.72	67163.5
9	60	80	535.199	99.807	77.4466	TRUE	80.0062	-13.2358	7.69266	0.0165788	60	19.4682	19.3	0.332144	191.708	0.762267	0.677896	-184.375	0.124937	79.6601	0.6112	-13.9698	8.38961	82.6901	0.191726	0.327413	0.017393	6069.55	67439.5
10	60	85	533.264	105.013	79.0011	TRUE	85.4379	-9.65231	3.61093	0.0120013	60	19.2968	19.1	0.328995	189.893	0.762021	0.67765	-182.629	0.123709	85.5508	0.611749	-9.70644	4.54218	82.6625	0.195543	0.323768	0.0121251	6064.31	67381.2
11	60	90	535.963	109.672	81.3619	TRUE	90.0974	-6.60683	3.12527	0.00854551	60	19.105	19	0.326253	188.312	0.761805	0.677434	-181.109	0.12264	90.1666	0.607996	-6.58284	3.3838	82.4089	0.199149	0.322454	0.00852402	6017.52	66861.3
12	60	95	537.974	118.085	83.4654	TRUE	95.0069	-3.35144	1.37226	0.00465477	60	18.7602	18.6	0.320243	184.854	0.761325	0.676955	-177.783	0.120303	95.0203	0.607708	-3.36637	1.71557	82.3346	0.202661	0.320679	0.00470716	6003.57	66706.4
13	60	98	541.385	128.341	84.8674	TRUE	97.9832	-1.35228	0.546968	0.00229752	60	18.2807	18.1	0.312033	180.106	0.760653	0.676282	-173.217	0.117097	97.9402	0.609265	-1.57112	0.424296	82.3782	0.204434	0.319374	0.0025137	6011.35	66792.7
14	65	70	536.01	93.7383	58.5529	TRUE	70.5839	-19.5191	13.9455	0.0238442	65	19.2558	19.1	0.328141	189.395	0.761953	0.677583	-182.15	0.123373	70.4796	0.660641	-19.6808	14.5421	85.3409	0.187474	0.332596	0.0239911	6572.11	73023.5
15	65	75	534.728	96.3474	59.462	TRUE	75.0159	-16.9522	10.1747	0.0205129	65	19.1561	19	0.3265	188.463	0.761825	0.677455	-181.254	0.122742	74.8382	0.662876	-16.7666	11.2209	85.4217	0.189791	0.329715	0.0203576	6587.71	73196.8
16	65	80	534.418	99.8313	61.1314	TRUE	80.0001	-13.6752	7.17521	0.0165549	65	19.0242	18.8	0.324115	187.079	0.761635	0.677264	-179.923	0.121807	79.9121	0.661106	-14.2442	7.8688	85.3096	0.191506	0.326814	0.0171764	6565.82	72953.6
17	65	85	535.138	104.345	63.3435	TRUE	85.1357	-10.1579	5.30352	0.0124971	65	18.8544	18.7	0.320716	185.109	0.761361	0.676991	-178.029	0.120476	85.2232	0.66081	-9.68813	5.59351	85.2251	0.196353	0.324492	0.0119741	6549.17	72768.6
18	65	90	535.682	109.597	65.2619	TRUE	90.0005	-6.84845	3.0919	0.00859622	65	18.6352	18.5	0.317618	183.311	0.761109	0.676738	-176.299	0.119261	90.3152	0.659489	-6.68712	3.5862	85.1097	0.199306	0.322534	0.0084582	6526.66	72518.4
19	65	95	537.992	118.065	67.4559	TRUE	95.0001	-3.44717	1.41866	0.00466169	65	18.2566	18.1	0.311112	179.58	0.760577	0.676207	-172.711	0.116742	94.8278	0.661323	-3.51591	1.7672	85.1438	0.202591	0.320687	0.00476514	6533	72588.9
20	65	98	540.18	126.083	68.6314	TRUE	97.5258	-1.70856	0.626269	0.00265474	64.9948	17.8603	17.7	0.304322	175.649	0.760005	0.675635	-168.93	0.114089	97.738	0.659887	-1.43191	0.648372	85.0307	0.20479	0.319529	0.00234906	6510.84	72342.7
21	70	70	534.416	93.2391	42.6443	TRUE	70.012	-20.8343	12.8263	0.0244566	70	18.8438	18.7	0.32082	185.179	0.761371	0.677001	-178.096	0.120523	70.0028	0.712749	-20.6343	13.7034	87.9497	0.186409	0.331744	0.0242509	7092.89	78809.9
22	70	75	535.607	96.5676	45.1524	TRUE	75.2643	-17.0301	11.2023	0.020276	70	18.7122	18.5	0.318526	183.855	0.761185	0.676815	-176.823	0.119628	75.5869	0.712259	-16.693	11.4873	87.875	0.190393	0.329659	0.0198631	7077.39	78637.7
23	70	80	534.418	99.8313	46.3098	TRUE	80	-14.0172	7.35459	0.0165549	70	18.579	18.4	0.317022	182.981	0.761062	0.676692	-175.982	0.119038	79.5504	0.710672	-14.288	8.39348	87.7705	0.19204	0.327039	0.0169119	7056.02	78400.2
24	70	85	534.713	104.306	48.3806	TRUE	85.062	-10.4758	5.16278	0.0125243	70	18.3997	18.2	0.313209	180.78	0.760749	0.676379	-173.865	0.117552	84.7472	0.714501	-10.6819	6.05652	87.9029	0.19556	0.324819	0.0127902	7082.91	78699
25	70	90	535.676	109.6	50.44	TRUE	90.0024	-7.01829	3.16496	0.00859408	70	18.16	18	0.308983	178.347	0.760399	0.676029	-171.525	0.115909	89.3148	0.715572	-7.54136	4.17065	87.9031	0.198681	0.322992	0.00923042	7082.73	78697
26	70	95	538.579	117.98	52.6944	TRUE	95.0102	-3.53427	1.63903	0.00468957	70	17.749	17.6	0.302271	174.458	0.759829	0.675459	-167.785	0.113287	94.9794	0.711323	-3.4716	1.87928	87.6287	0.202796	0.320728	0.00463765	7026.37	78070.8
27	70	98	540.635	127.481	53.934	TRUE	97.8091	-1.54514	0.563792	0.00242463	70.0002	17.2469	17.1	0.293809	169.588	0.759097	0.674727	-163.102	0.110005	97.818	0.711071	-1.50209	0.785945	87.5773	0.204808	0.319631	0.00240289	7015.67	77951.9
28	75	70	535.61	93.3419	29.5211	TRUE	70.0172	-20.9728	14.5324	0.0243301	75	18.4166	18.2	0.312784	180.539	0.760715	0.676344	-173.633	0.117389	69.7338	0.764626	-21.2228	15.6006	90.4075	0.186926	0.332895	0.0246015	7607.93	84532.5
29	75	75	534.733	96.3573	30.85	TRUE	75.0317	-17.7685	10.6683	0.0205004	75	18.2855	18.1	0.310654	179.318	0.760539	0.676169	-172.459	0.116565	75.1835	0.761022	-17.611	11.0957	90.2072	0.189445	0.329235	0.020311	7564.87	84054.1
30	75	80	534.855	99.8065	32.6676	TRUE	80.0009	-14.3051	7.92578	0.016574	75	18.1335	17.9	0.308095	177.821	0.760323	0.675952	-171.019	0.115555	79.7423	0.764037	-14.2091	8.46617	90.3003	0.19251	0.326894	0.016459	7584.7	84274.5
31	75	85	534.738	104.273	34.5778	TRUE	85.0294	-10.7421	5.32326	0.0125532	75	17.9431	17.8	0.304944	176.012	0.760058	0.675688	-169.279	0.114334	85.1579	0.761428	-10.6964	5.61996	90.1333	0.195566	0.324361	0.0124892	7548.84	83876
32	75	90	535.963	109.578	36.7046	TRUE	90.0197	-7.17257	3.41046	0.00860903	75	17.6832	17.5	0.300882	173.665	0.759711	0.675341	-167.022	0.112752	90.0156	0.761375	-7.17913	3.88223	90.0718	0.199156	0.322645	0.0086435	7535.46	83727.3
33	75	95	538.479	117.971	38.8825	TRUE	95.0017	-3.62177	1.64822	0.00469089	75	17.2461	17.1	0.293621	169.469	0.759079	0.674709	-162.987	0.109925	95.044	0.762318	-4.02218	1.6765	90.0604	0.202078	0.320584	0.00508533	7532.74	83697.1
34	75	98	538.999	125.438	39.8751	TRUE	97.3129	-1.92993	0.554009	0.00278304	74.9921	16.8438	16.6	0.286418	165.309	0.758436	0.674066	-158.986	0.107124	96.9249	0.76328	-2.20533	0.860415	90.0634	0.203984	0.319747	0.00309802	7533.17	83701.9
35	80	70	534.173	93.212	15.8171	TRUE	70.0275	-21.8306	13.1191	0.0244603	80	17.9903	17.8	0.305456	176.304	0.760101	0.675731	-169.56	0.114531	69.7401	0.815913	-21.8838	14.1241	92.7471	0.18597	0.331624	0.0245099	8120.97	90233
36	80	75	534.658	96.3525	17.903	TRUE	75.0318	-18.1706	10.8089	0.0205025	80	17.8505	17.7	0.302915	174.841	0.759886	0.675515	-168.153	0.113544	75.0746	0.813909	-18.209	11.5617	92.6123	0.189296	0.329411	0.0205395	8090.62	89895.7
37	80	80	534.638	99.8251	19.6788	TRUE	80.0054	-14.6345	7.88073	0.0165613	80	17.6884	17.5	0.300714	173.576	0.759698	0.675328	-166.936	0.112692	79.5419	0.812532	-14.766	8.65781	92.5061	0.192199	0.326933	0.0167218	8066.73	89630.3
38	80	85	534.703	104.638	21.7898	TRUE	85.3962	-10.7092	5.18409	0.0122501	80	17.468	17.3	0.297245	171.566	0.759397	0.675027	-165.003	0.111337	85.1726	0.812791	-10.9359	5.72674	92.4658	0.195553	0.324349	0.0124914	8057.57	89528.5
39	80	90	535.678	109.597	23.7333	TRUE	90.0004	-7.33922	3.31114	0.00859588	80	17.2098	17	0.292743	168.964	0.759002	0.674632	-162.501	0.109584	89.8985	0.813309	-7.5447	3.58483	92.4351	0.198723	0.322375	0.00879668	8050.51	89450.1
40	80	95	537.992	118.065	25.928	TRUE	95	-3.69426	1.52036	0.00466175	80	16.7439	16.5	0.284357	164.128	0.758251	0.673881	-157.85	0.10633	94.8763	0.812532	-4.04909	1.7299	92.3361	0.20216	0.320591	0.00502785	8028.09	89201.1
41	80	98	540.82	128.47	27.3114	TRUE	97.9765	-1.48431	0.527644	0.00228292	79.9999	16.1063	15.9	0.272937	157.546	0.757193	0.672823	-151.519	0.101905	97.8541	0.815068	-1.32025	0.633779	92.3907	0.20503	0.319459	0.0021227	8039.89	89332.1
42	85	70	535.815	93.349	4.60567	TRUE	70.0068	-21.8035	15.4108	0.0243098	85	17.5635	17.4	0.2982	172.125	0.759481	0.675111	-165.541	0.111714	69.6623	0.864528	-21.9593	16.3958	94.8502	0.187158	0.332979	0.0244807	8601.22	95569.1
43	85	75	535.801	96.466	6.34416	TRUE	75.02	-18.2872	12.3371	0.0204487	85	17.4118	17.2	0.295117	170.343	0.759212	0.674842	-163.827	0.110513	74.7852	0.865643	-18.3429	13.2666	94.8537	0.190178	0.330425	0.0205249	8601.87	95576.3
44	85	80	534.627	99.8216	7.5481	TRUE	80.0002	-14.938	8.03431	0.0165649	85	17.2434	17	0.292271	168.689	0.75896	0.674589	-162.236	0.109399	79.8541	0.865057	-15.1251	8.71912	94.8013	0.192092	0.326849	0.0167502	8589.53	95439.3
45	85	85	534.974	104.239	9.60049	TRUE	85.0115	-11.2062	5.74257	0.0125858	85	17.0278	16.8	0.288892	166.74	0.758659	0.674289	-160.362	0.108087	84.8231	0.863412	-11.3084	6.22993	94.6734	0.195545	0.324649	0.0126914	8559.62	95106.9
46	85	90	535.671	109.601	11.6077	TRUE	90.0022	-7.48752	3.37322	0.00859362	85	16.7346	16.5	0.283725	163.763	0.758194	0.673823	-157.499	0.106084	89.7381	0.866085	-8.00564	3.95768	94.7377	0.198496	0.322627	0.00913259	8574.32	95270.2
47	85	95	537.992	118.066	13.8031	TRUE	95.0003	-3.76945	1.55111	0.00466148	85	16.2396	16	0.275273	158.878	0.757411	0.67304	-152.801	0.1028	95.1557	0.864866	-3.73651	1.61319	94.6101	0.202572	0.320435	0.0046145	8544.32	94936.9
48	85	98	541.98	128.55	15.2503	TRUE	98.0361	-1.48272	0.668733	0.00226924	85	15.5349	15.3	0.263341	151.994	0.756265	0.671895	-146.18	0.0981782	97.4286	0.866235	-1.86934	1.56893	94.6176	0.204835	0.320209	0.00276679	8545.66	94951.7
49	90	70	548.554	100.16	0.000204225	TRUE	70.003	-15.7978	25.3025	0.0200265	90	16.7018	16.5	0.282255	162.91	0.758058	0.673688	-156.678	0.10551	69.3096	0.915859	-15.8158	26.2312	96.8374	0.198435	0.338533	0.0201145	9071.42	100794
50	90	75	546.399	101.343	0.000229517	TRUE	75.0025	-14.3438	20.5746	0.0177708	90	16.6397	16.5	0.282211	162.885	0.758055	0.673684	-156.655	0.105494	74.432	0.912119	-14.3413	21.177	96.6887	0.198287	0.335159	0.0178059	9035.52	100395
51	90	80	543.907	102.85	0.000256234	TRUE	80.0018	-12.6388	15.543	0.0152611	90	16.5637	16.4	0.280668	161.991	0.757912	0.673542	-155.794	0.104892	79.6354	0.916444	-12.6705	16.1619	96.8609	0.198315	0.331627	0.0153121	9077.07	100856
52	90	85	540.731	105.022	0.000329998	TRUE	85.0014	-10.5526	9.9627	0.0123536	90	16.4617	16.2	0.278559	160.782	0.757719	0.673348	-154.632	0.10408	84.6801	0.915909	-10.8483	10.5502	96.8391	0.198155	0.32757	0.0126586	9071.8	100798
53	90	90	536.057	109.602	0.270197	TRUE	90.0468	-7.60165	3.67336	0.00859585	90	16.2551	16	0.274977	158.714	0.757384	0.673014	-152.643	0.102689	90.3054	0.914821	-7.32615	3.69018	96.7647	0.199322	0.322295	0.00828939	9053.79	100598
54	90	95	537.989	118.106	2.37748	TRUE	95.0166	-3.82931	1.5703	0.00464775	90	15.7329	15.6	0.266714	153.951	0.756596	0.672226	-148.063	0.0994918	94.9684	0.913531	-4.09693	1.77395	96.6508	0.202284	0.320562	0.00491457	9026	100289
55	90	98	540.769	126.805	3.63286	TRUE	97.694	-1.77674	0.703218	0.00253101	89.9973	15.1275	14.9	0.256004	147.766	0.755536	0.671166	-142.114	0.0953436	97.6225	0.915239	-1.71946	0.701486	96.67	0.204632	0.319526	0.00246501	9030.31	100337
56	55	No cons	556.682	34.2435	0.133679	TRUE	-27.1098	-61.2117	121.921	0.0839978	55	21.9682	22	0.377293	217.762	0.765561	0.681191	-209.433	0.142607	-27.9422	0.546221	-59.7603	122.986	79.086	0.15467	0.383398	0.0827899	5432.48	60360.9
57	60	No cons	557.486	38.5536	0.209621	TRUE	-21.1504	-57.5512	123.508	0.0787744	60	21.6346	21.7	0.371841	214.631	0.765187	0.680816	-206.422	0.140479	-21.6995	0.598775	-56.2985	124.575	82.0059	0.161228	0.382559	0.0776827	5948.53	66094.8
58	65	No cons	558.225	42.9464	0.466191	TRUE	-14.2916	-53.4302	123.983	0.0734162	65	21.265	21.3	0.36515	210.765	0.764717	0.680346	-202.703	0.137853	-15.3884	0.65113	-52.8148	125.759	84.7484	0.167453	0.381731	0.0729045	6461.98	71799.8
59	70	No cons	559.732	47.8962	0.765234	TRUE	-6.22725	-47.7394	123.633	0.0669217	70	20.8448	20.9	0.358486	206.906	0.764239	0.679869	-198.991	0.135234	-7.4407	0.697784	-47.2521	125.497	87.0471	0.175793	0.380591	0.0666362	6913.97	76821.9
60	75	No cons	561.229	53.7996	0.853139	TRUE	2.29079	-41.3944	121.947	0.0601324	75	20.3488	20.4	0.350227	202.149	0.763637	0.679267	-194.416	0.132008	1.12463	0.75017	-41.4948	124.245	89.5116	0.184247	0.379281	0.0603576	7421.33	82459.2
61	80	No cons	562.177	61.4166	0.241822	TRUE	9.32669	-36.594	116.274	0.0547006	80	19.7201	19.8	0.339338	195.868	0.762822	0.678451	-188.376	0.127753	8.6426	0.804982	-36.5049	118.995	91.996	0.191254	0.377505	0.0547537	7956.79	88408.8
62	85	No cons	562.936	72.5078	0.046146	TRUE	15.1131	-31.603	103.506	0.0485154	85	18.802	18.9	0.322842	186.346	0.761533	0.677163	-179.218	0.121311	14.2549	0.859821	-31.7275	107.566	94.3797	0.197047	0.374452	0.048917	8493.45	94371.7
63	90	No cons	560.568	96.1752	0.00102072	TRUE	41.3472	-21.6488	54.3677	0.0313326	90	16.9062	17	0.291347	168.162	0.758879	0.674508	-161.729	0.109044	36.6757	0.916197	-23.2593	60.8284	96.7829	0.2	0.357947	0.0338414	9058.39	100649
